# Supplementary material for: Mechanistic information from volume profiles for water exchange and complex-formation reactions of aquated Ni(II). pH, buffer and medium effects
Source: Royal Society of Chemistry journal article supplement (doi:10.1039/b912911a), 2009-01-01
Supplement: b912911a.pdf [file b912911a.pdf]

**Supporting Information**

**Mechanistic information from volume profiles for water exchange  
and complex-formation reactions of aquated Ni(II).  
pH, buffer and medium effects**

Hanaa Asaad Gazzaz, Erika Ember, Achim Zahl and Rudi van Eldik\*

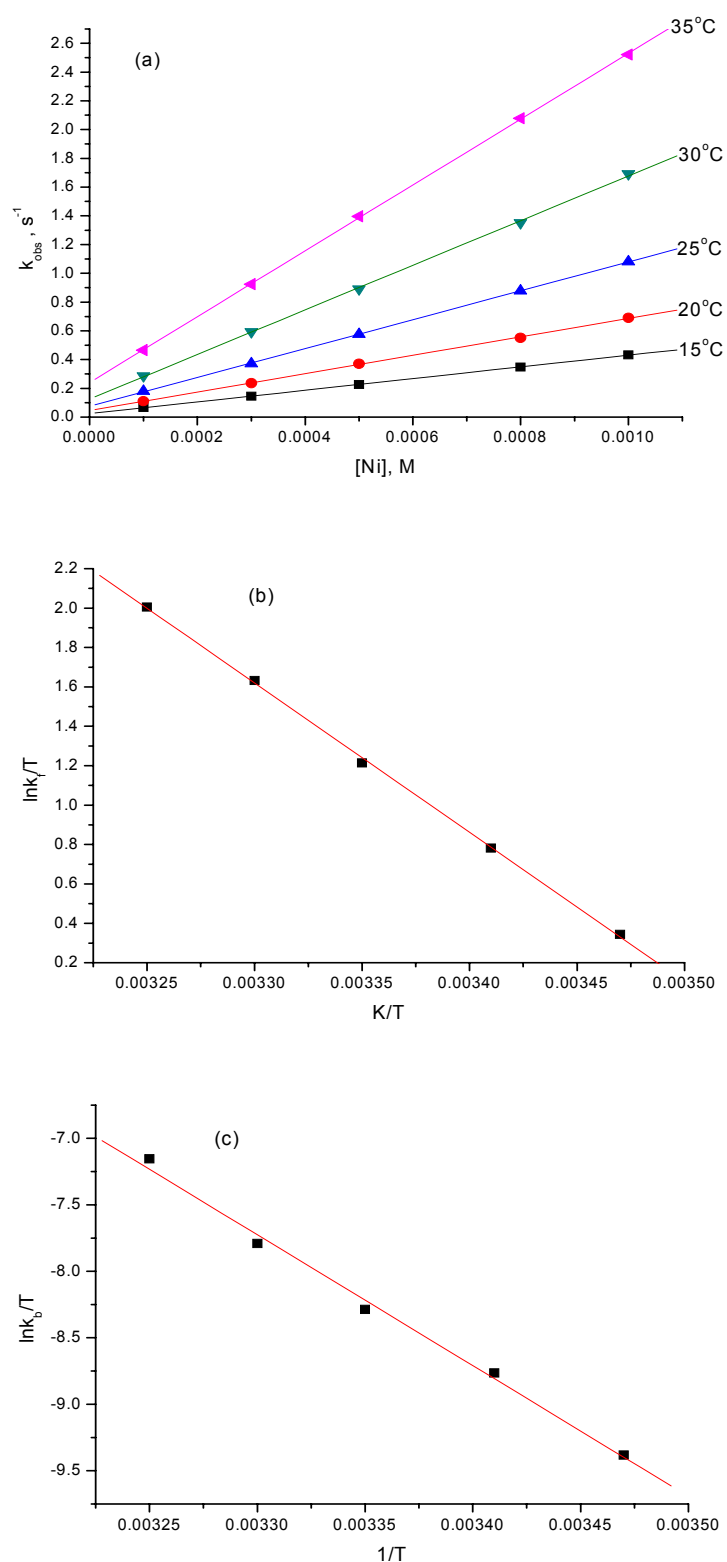

**Figure S1.** (a) Variation of the observed rate constant  $k_{\text{obs}}$  with  $\text{Ni}^{2+}$  concentration for the reaction between  $\text{Ni}^{2+}$  and  $1 \times 10^{-5}$  M PADA in 0.05 M MES buffer at pH 6, under ambient pressure and at different temperatures. (b) and (c) Eyring plots for the

forward rate constant  $k_f$  and the backward rate constant  $k_b$  of the reaction in (a), respectively.

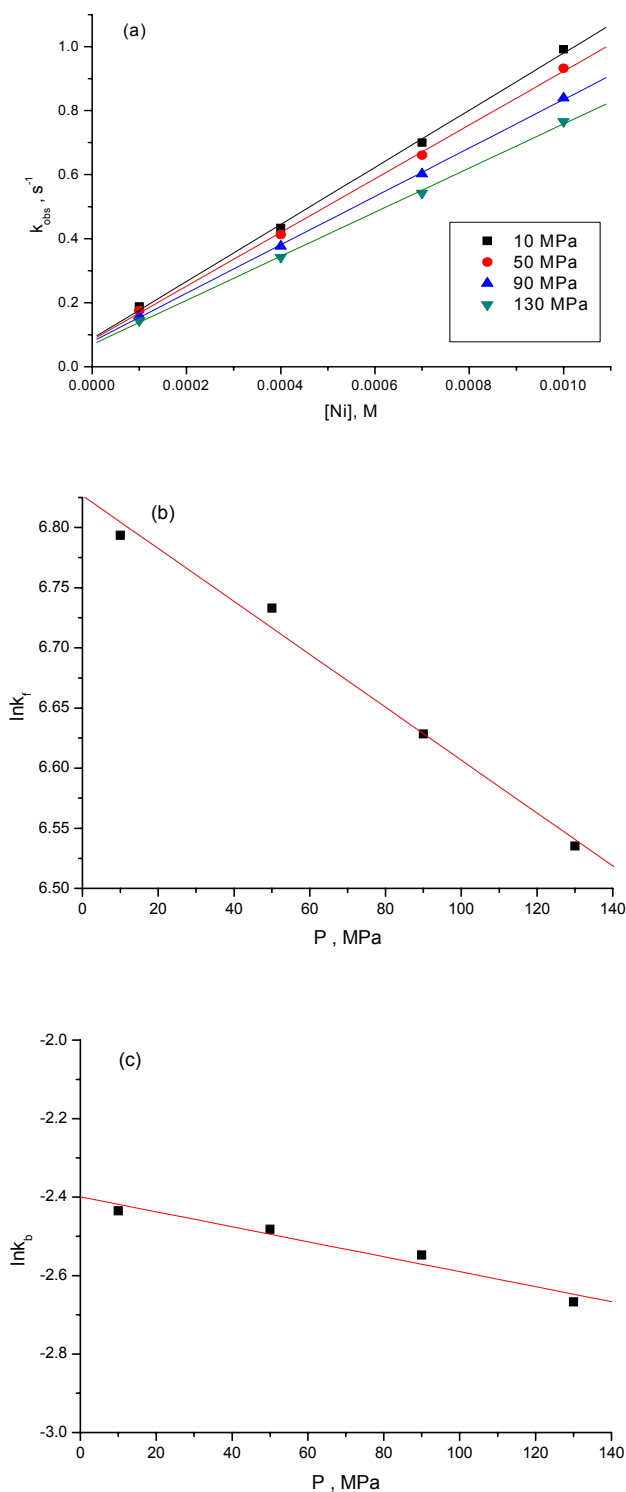

**Figure S2.** (a) Variation of the observed rate constant  $k_{\text{obs}}$  with Ni<sup>2+</sup> concentration for the reaction between Ni<sup>2+</sup> and  $1 \times 10^{-5}$  M PADA in 0.05 M MES buffer at pH 6, 25 °C and different pressures. (b) and (c) Pressure dependence of the forward rate constant  $k_f$  and the backward rate constant  $k_b$  for the reaction in (a), respectively.

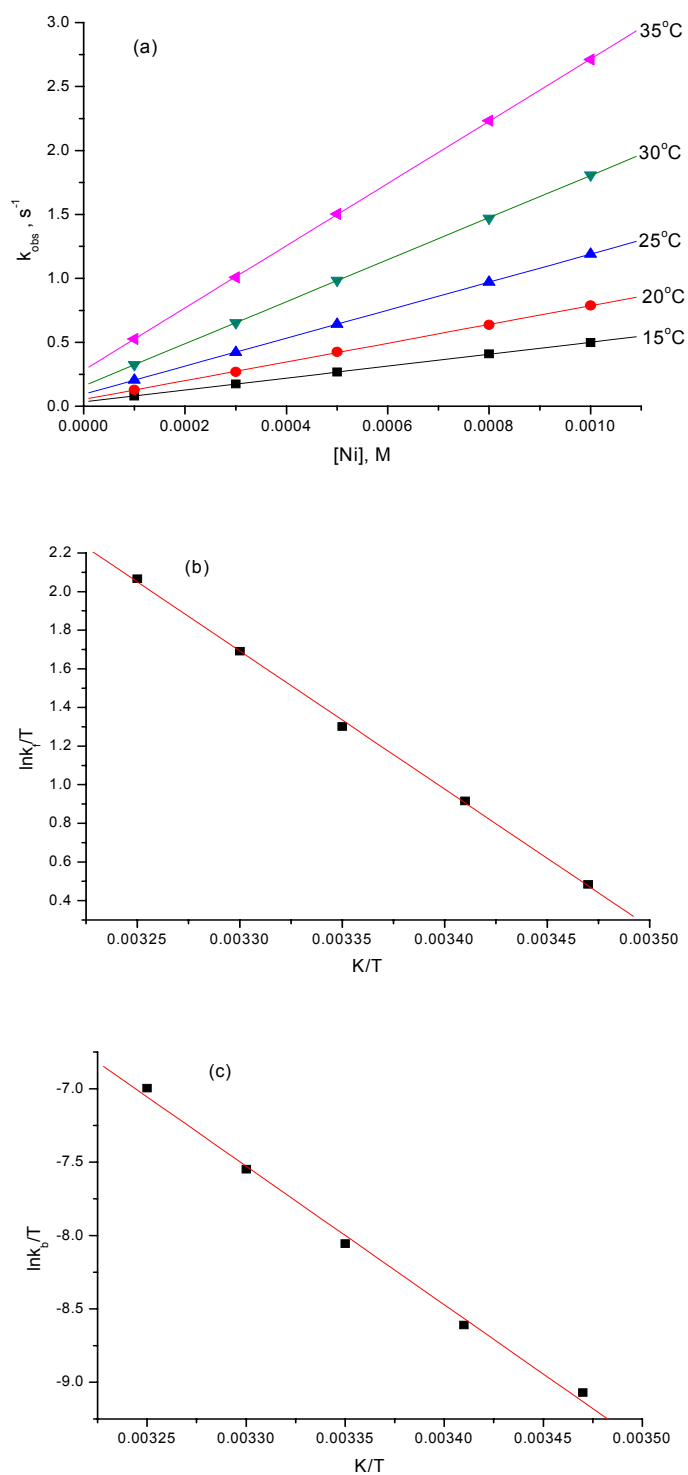

**Figure S3.** (a) Variation of the observed rate constant  $k_{\text{obs}}$  with Ni<sup>2+</sup> concentration for the reaction between Ni<sup>2+</sup> and  $1 \times 10^{-5}$  M PADA in 0.05 M Tris buffer at pH 7, at ambient pressure and different temperatures. (b) and (c) Eyring plots for the forward rate constant  $k_f$  and the backward rate constant  $k_b$  of the reaction in (a), respectively.

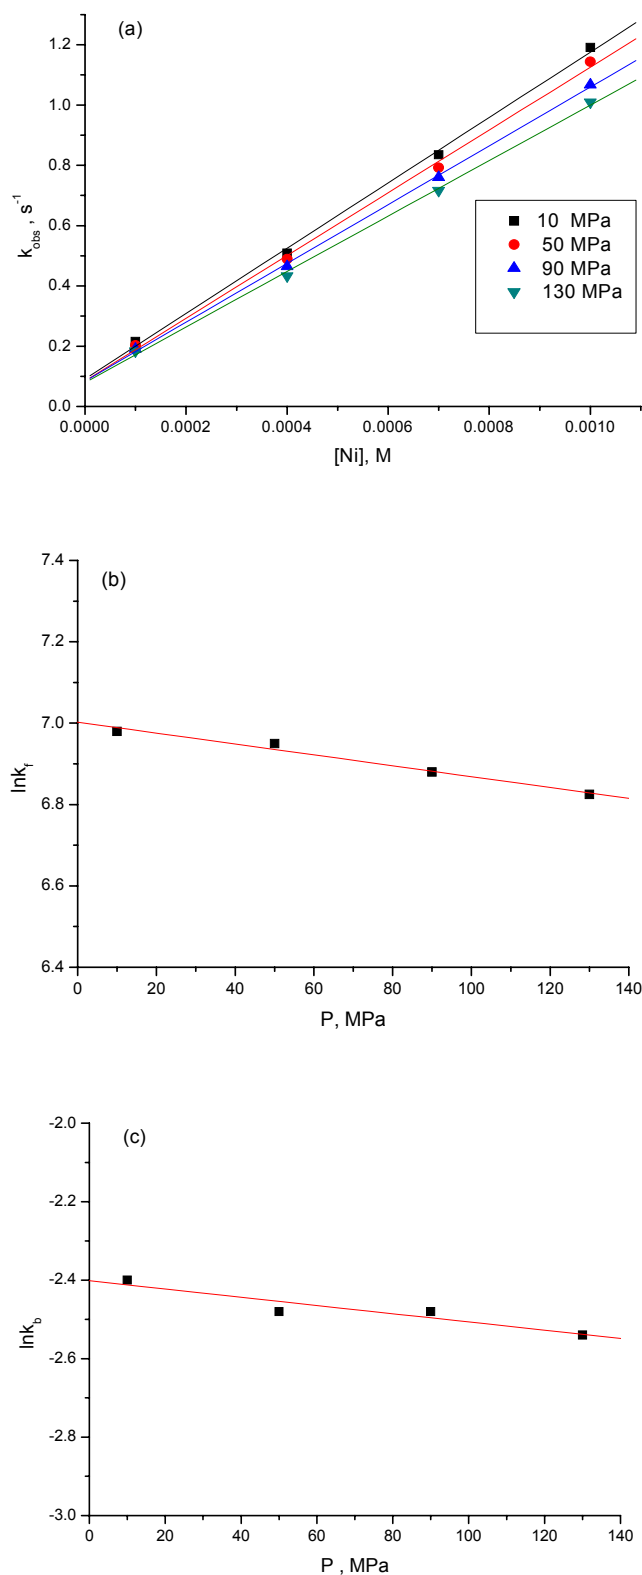

**Figure S4.** (a) Variation of the observed rate constant  $k_{\text{obs}}$  with Ni<sup>2+</sup> concentration for the reaction between Ni<sup>2+</sup> and  $1 \times 10^{-5}$  M PADA in 0.05 M Tris buffer at pH 7, 25 °C

and different pressures. (b) and (c) Pressure dependence of the forward rate constant  $k_f$  and the backward rate constant  $k_b$  for the reaction in (a), respectively.

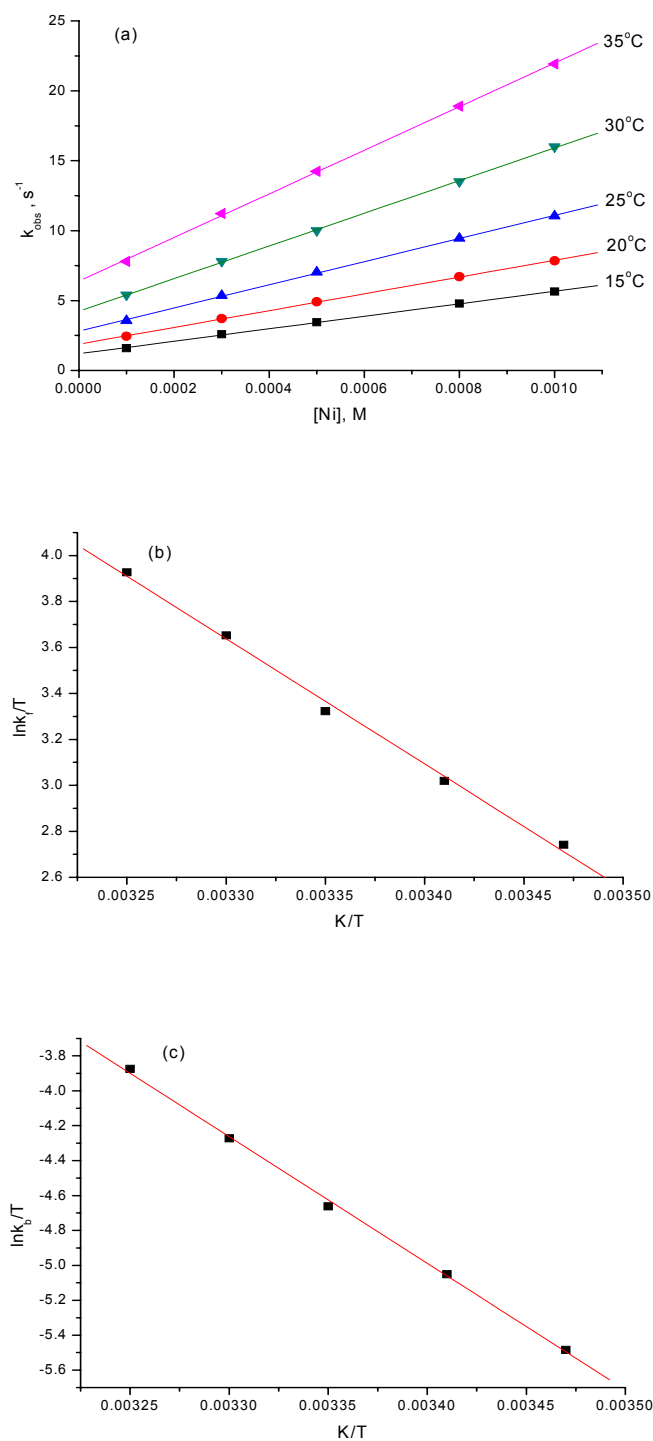

**Figure S5.** (a) Variation of the observed rate constant  $k_{\text{obs}}$  with Ni<sup>2+</sup> concentration for the reaction between Ni<sup>2+</sup> and  $1 \times 10^{-5}$  M PADA in 0.05 M Tris buffer at pH 9, ambient pressure and different temperatures. (b) and (c) Eyring plots for the forward rate constant  $k_f$  and the backward rate constant  $k_b$  of the reaction in (a), respectively.



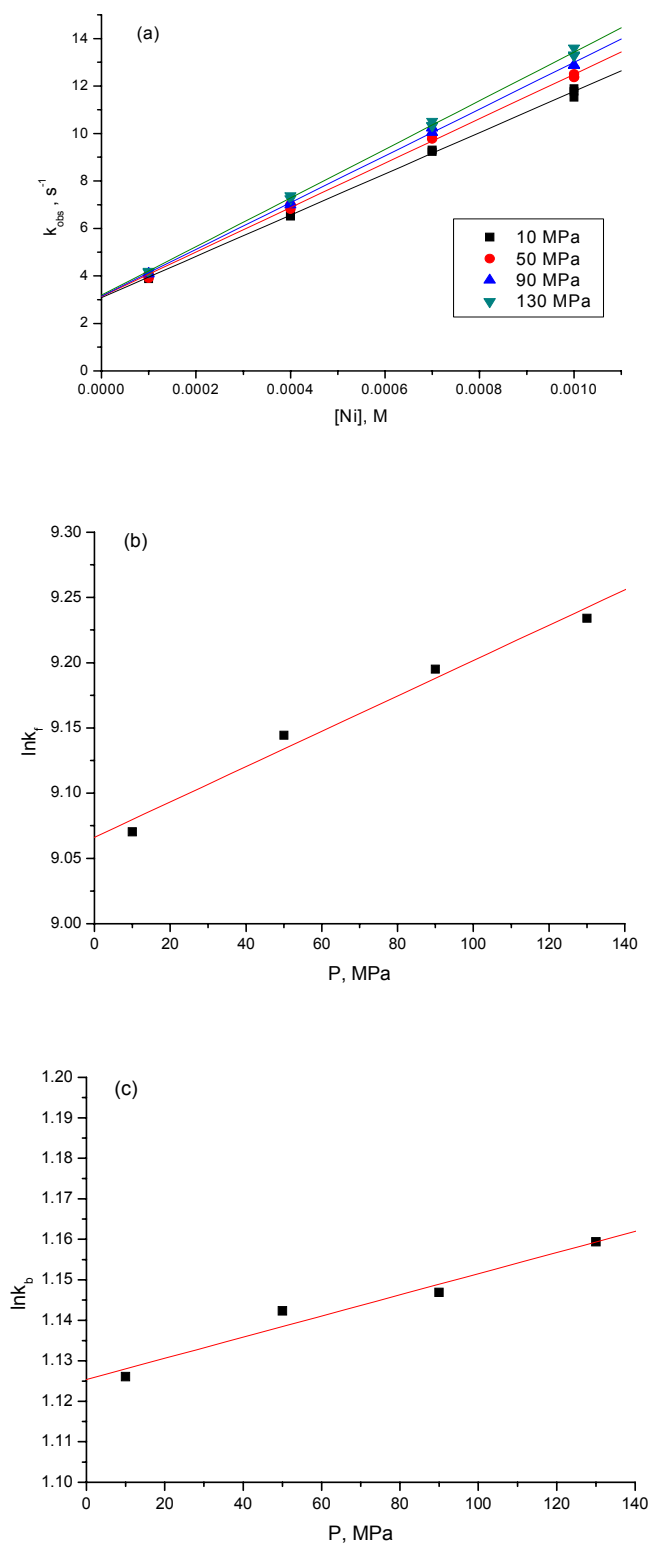

**Figure S6.** (a) Variation of the observed rate constant  $k_{\text{obs}}$  with Ni<sup>2+</sup> concentration for the reaction between Ni<sup>2+</sup> and  $1 \times 10^{-5}$  M PADA in 0.05 M Tris buffer at pH 9, 25 °C and different pressures. (b) and (c) Pressure dependence of the forward rate constant  $k_f$  and the backward rate constant  $k_b$  for the reaction in (a), respectively.

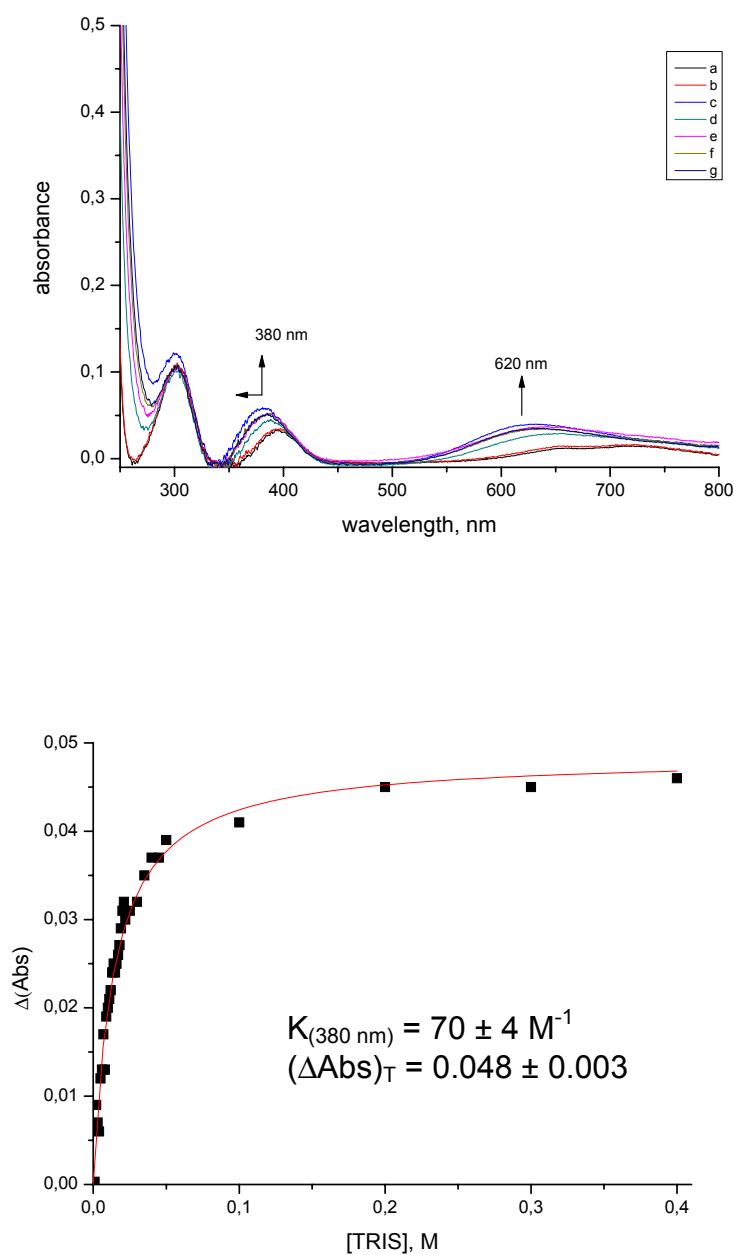

**Figure S7.** Spectrophotometric titration (top) and plot of the absorbance change at 380 nm that accompanies the complex-formation reaction as a function of Tris concentration (bottom). Experimental conditions: 10 mM Ni<sup>2+</sup>, (a) reference spectra, (b) 1 mM Tris, (c) 100 mM Tris, (d) 200 mM Tris, (e) 300 mM Tris, (f) 400 mM Tris, (g) 500 mM Tris, pH = 9 and 25 °C.

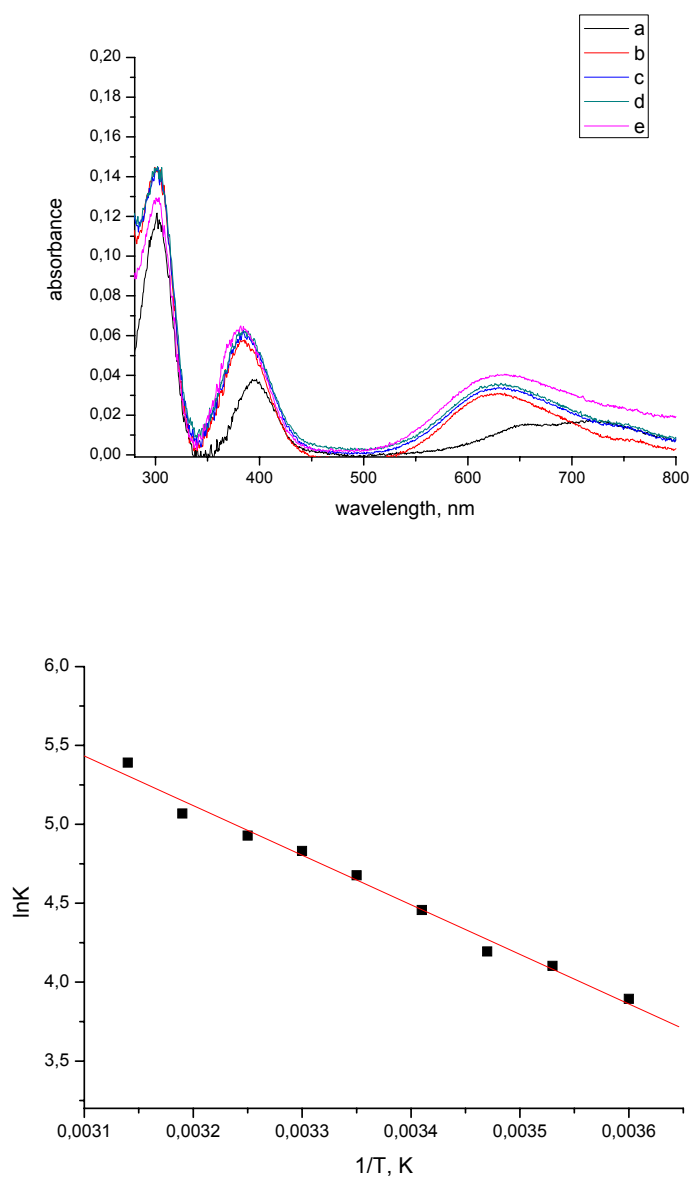

**Figure S8.** Effect of temperature on the complex-formation of  $\text{Ni}^{2+}$  by Tris at  $\text{pH} = 9$  (top) and plot of  $\ln K$  versus  $1/T$  (bottom). Experimental conditions: 10 mM  $\text{Ni}^{2+}$ , 25 mM Tris, spectrum of reactants before mixing (a) and after mixing (b) at 10 °C, (c) 20 °C, (d) 30 °C and (e) 40 °C, respectively, and  $\lambda = 380$  nm. The resulting thermodynamic parameters are  $\Delta H^\circ = 26 \pm 2$  kJ mol $^{-1}$  and  $\Delta S^\circ = +126 \pm 3$  J K $^{-1}$  mol $^{-1}$ .

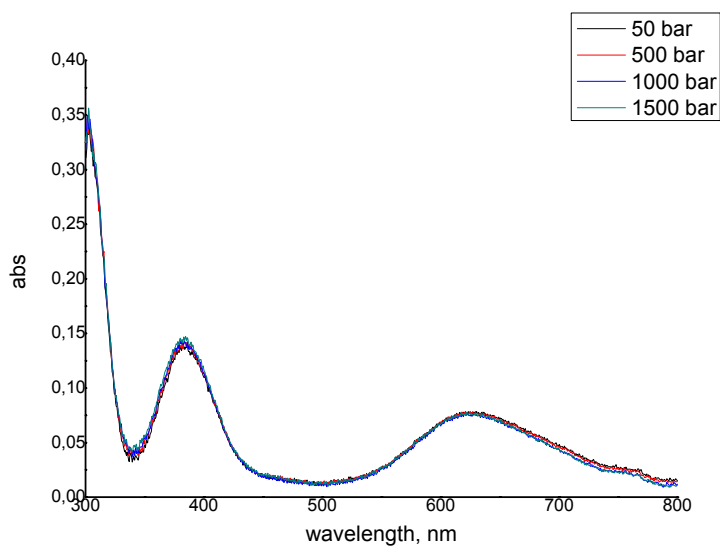

**Figure S9.** Effect of pressure on the Ni<sup>2+</sup>-Tris complex-formation equilibrium at pH = 9. Experimental conditions: 10 mM Ni<sup>2+</sup>, 25 mM Tris and 25 °C.

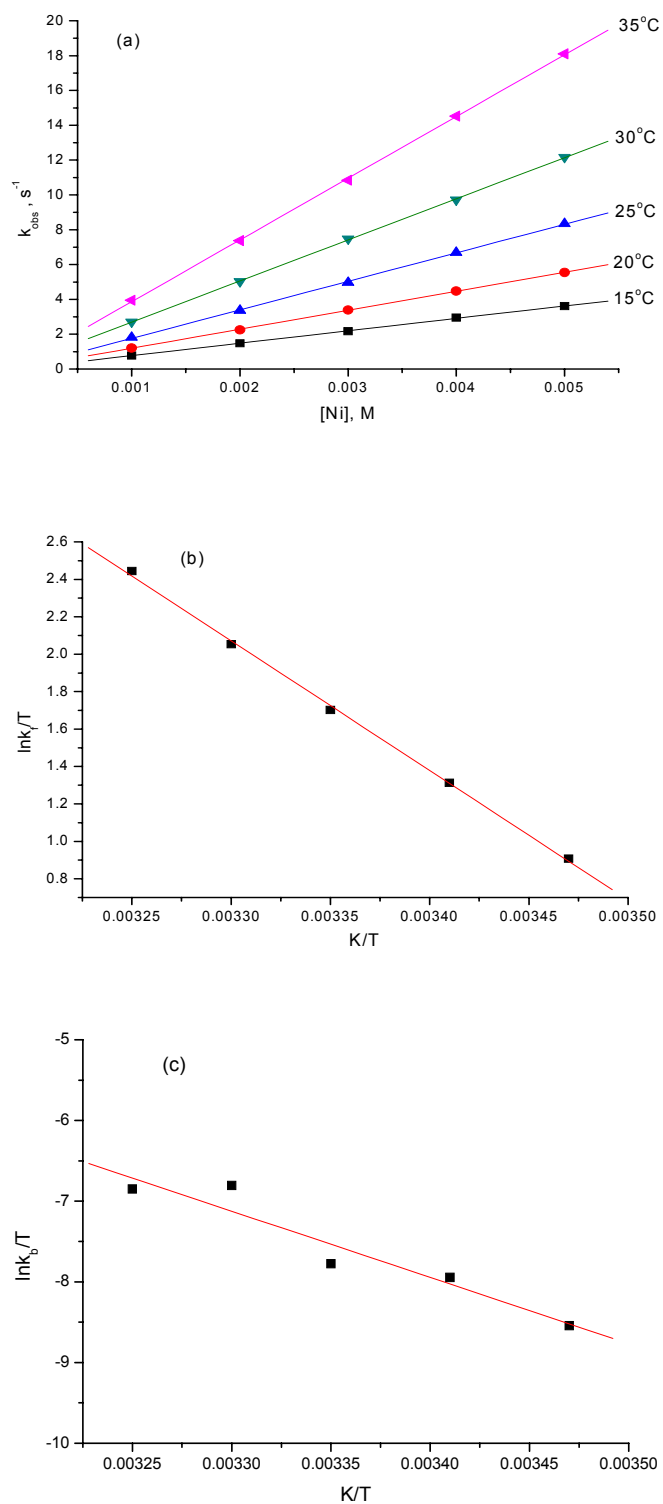

**Figure S10.** (a) Variation of the observed rate constant  $k_{\text{obs}}$  with  $\text{Ni}^{2+}$  concentration for the reaction between  $\text{Ni}^{2+}$  and  $5 \times 10^{-5}$  M Bipy in 0.05 M Tris buffer at pH 7,

ambient pressure and different temperatures. (b) and (c) Eyring plots for the forward rate constant  $k_f$  and the backward rate constant  $k_b$  of the reaction in (a), respectively.

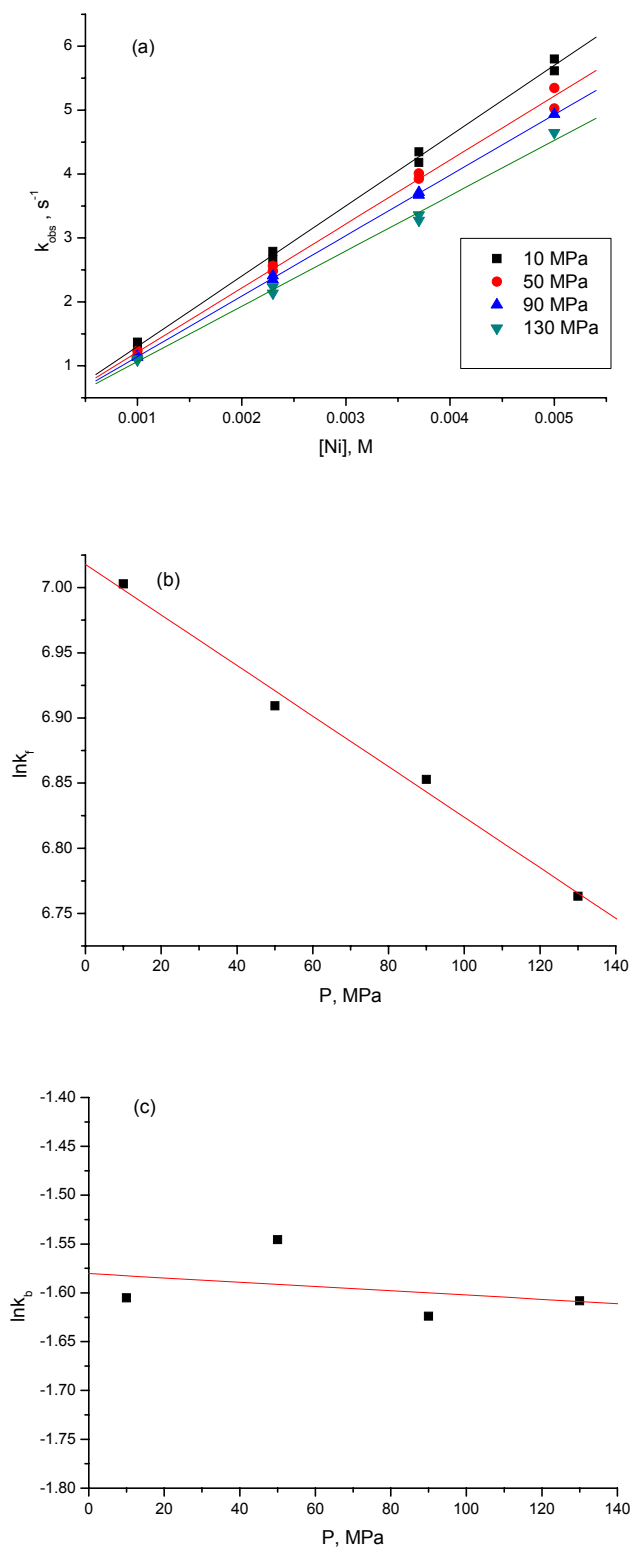

**Figure S11.** (a) Variation of the observed rate constant  $k_{\text{obs}}$  with  $\text{Ni}^{2+}$  concentration for the reaction between  $\text{Ni}^{2+}$  and  $5 \times 10^{-5}$  M Bipy in 0.05 M Tris buffer at pH 7, 25

°C and different pressures. (b) and (c) Pressure dependence of the forward rate constant  $k_f$  and the backward rate constant  $k_b$  for the reaction in (a), respectively.

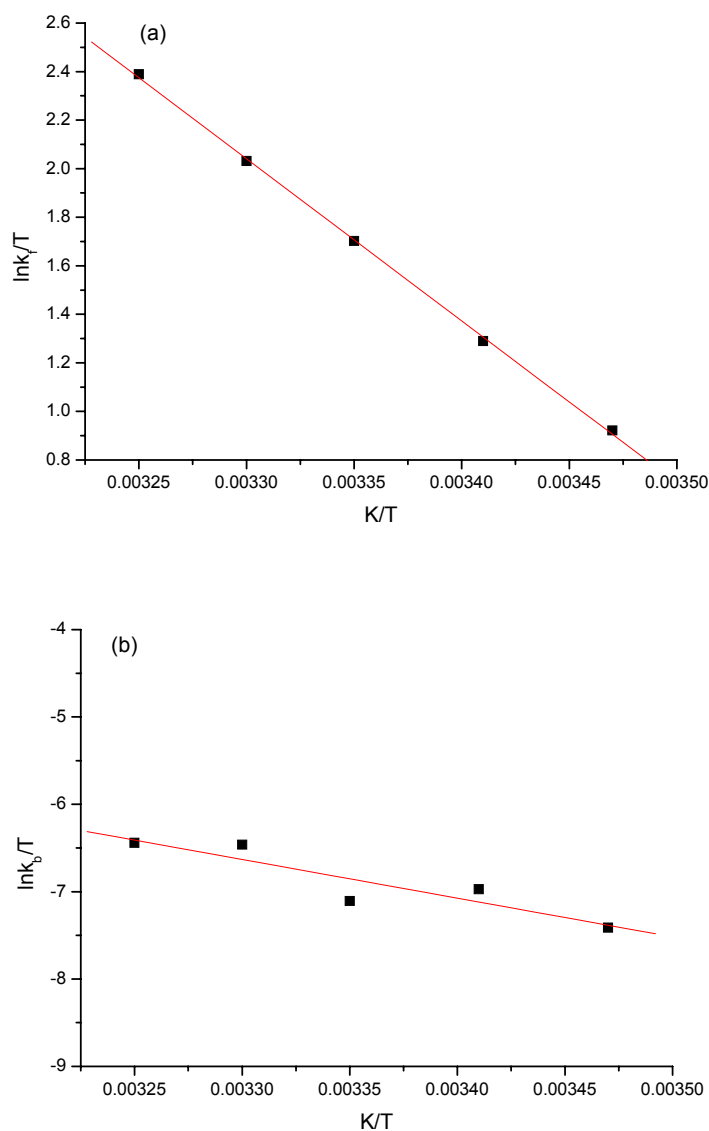

**Figure S12.** (a) and (b) Eyring plots for the forward rate constant  $k_f$  and the backward rate constant  $k_b$  of the reaction between  $\text{Ni}^{2+}$  and  $5 \times 10^{-5}$  M Bipy, respectively, in 0.05 M Tris buffer, pH 8 and at ambient pressure.

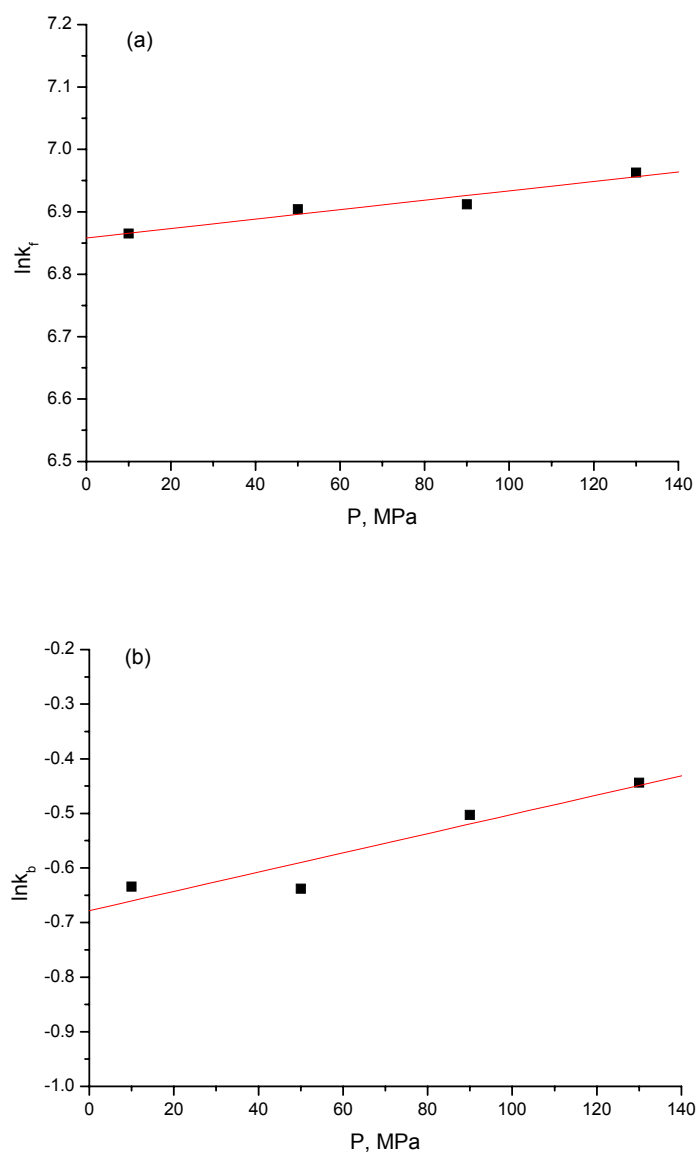

**Figure S13.** (a) and (b) Pressure dependence of the forward rate constant  $k_f$  and the backward rate constant  $k_b$  for the reaction between  $\text{Ni}^{2+}$  and  $5 \times 10^{-5}$  M Bipy, respectively, in 0.05 M Tris buffer at pH 8 and 25 °C.



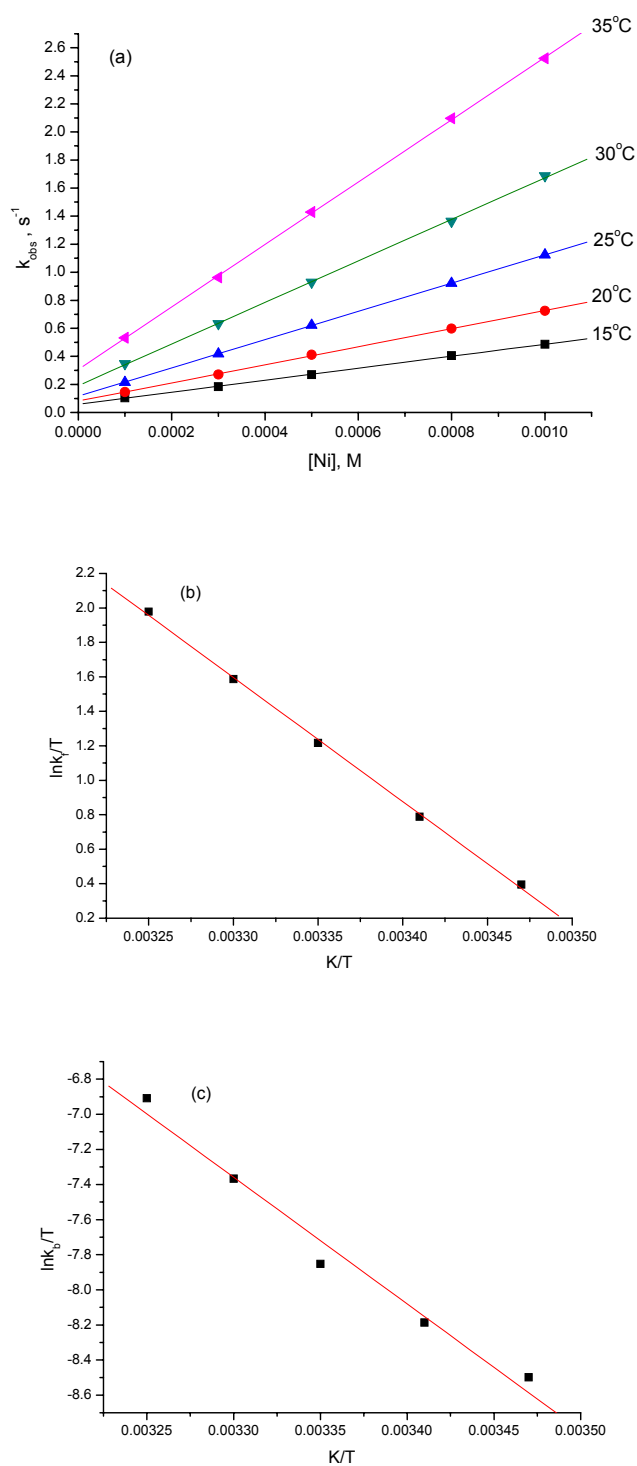

**Figure S14.** (a) Variation of the observed rate constant  $k_{\text{obs}}$  with Ni<sup>2+</sup> concentration for the reaction between Ni<sup>2+</sup> and  $1 \times 10^{-5}$  M PADA in 0.05 M N-ethylmorpholine buffer at pH 7, ambient pressure and different temperatures. (b) and (c) Eyring plots for the forward rate constant  $k_f$  and the backward rate constant  $k_b$  of the reaction in (a), respectively.

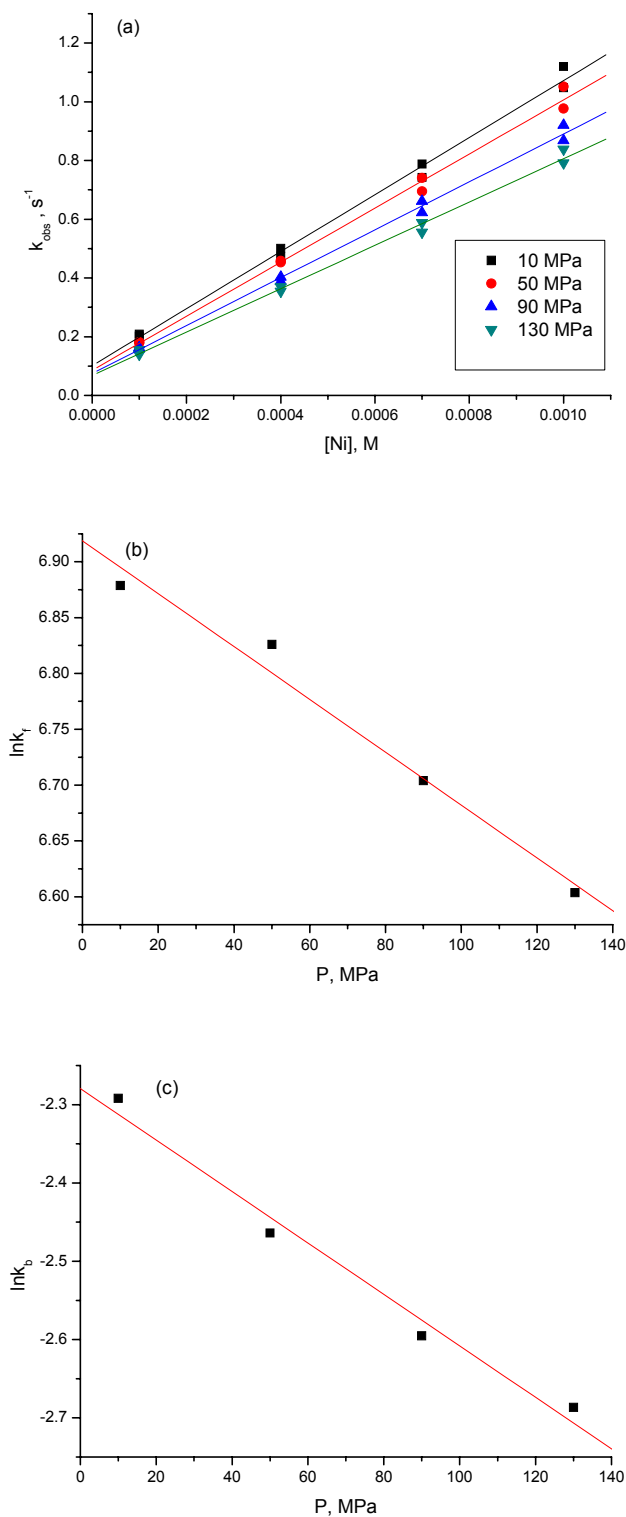

**Figure S15.** (a) Variation of the observed rate constant  $k_{obs}$  with Ni<sup>2+</sup> concentration for the reaction between Ni<sup>2+</sup> and  $1 \times 10^{-5}$  M PADA in 0.05 M N-ethylmorpholine buffer at pH 7, 25 °C and different pressures. (b) and (c) Pressure dependence of the

forward rate constant  $k_f$  and the backward rate constant  $k_b$  for the reaction in (a), respectively.

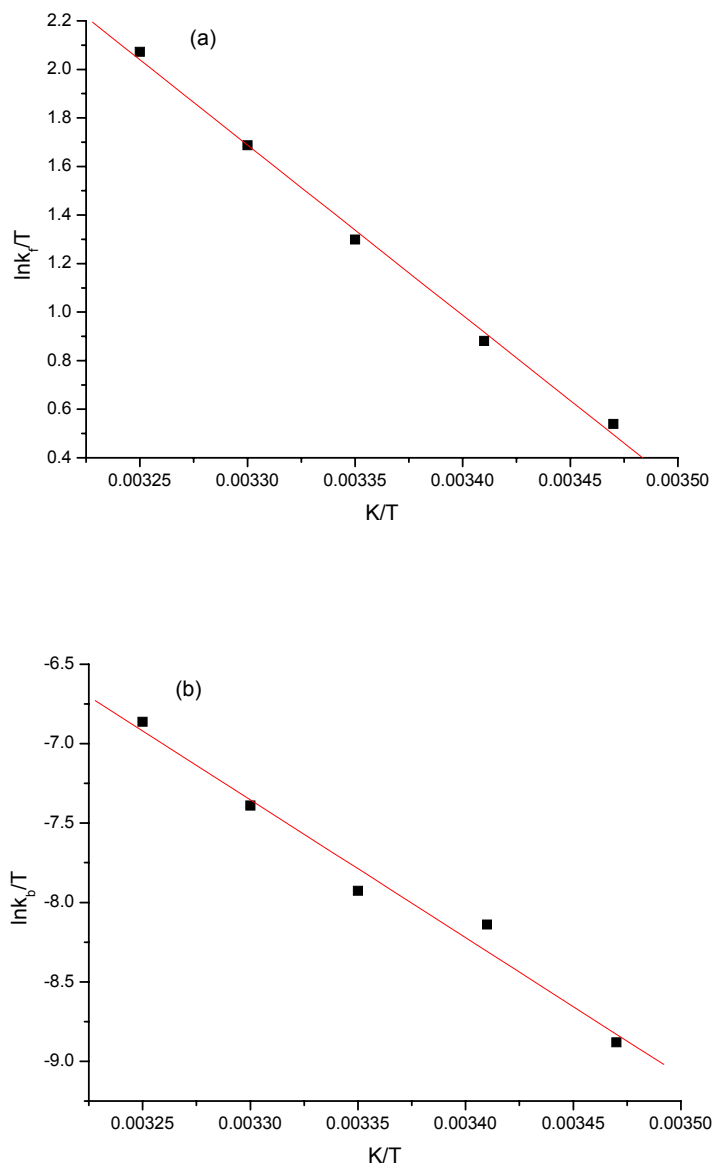

**Figure S16.** (a) and (b) Eyring plots for the forward rate constant  $k_f$  and the backward rate constant  $k_b$  of the reaction between  $\text{Ni}^{2+}$  and  $1 \times 10^{-5}$  M PADA, respectively, in 0.05 M N-ethylmorpholine buffer, pH 8 and at ambient pressure.

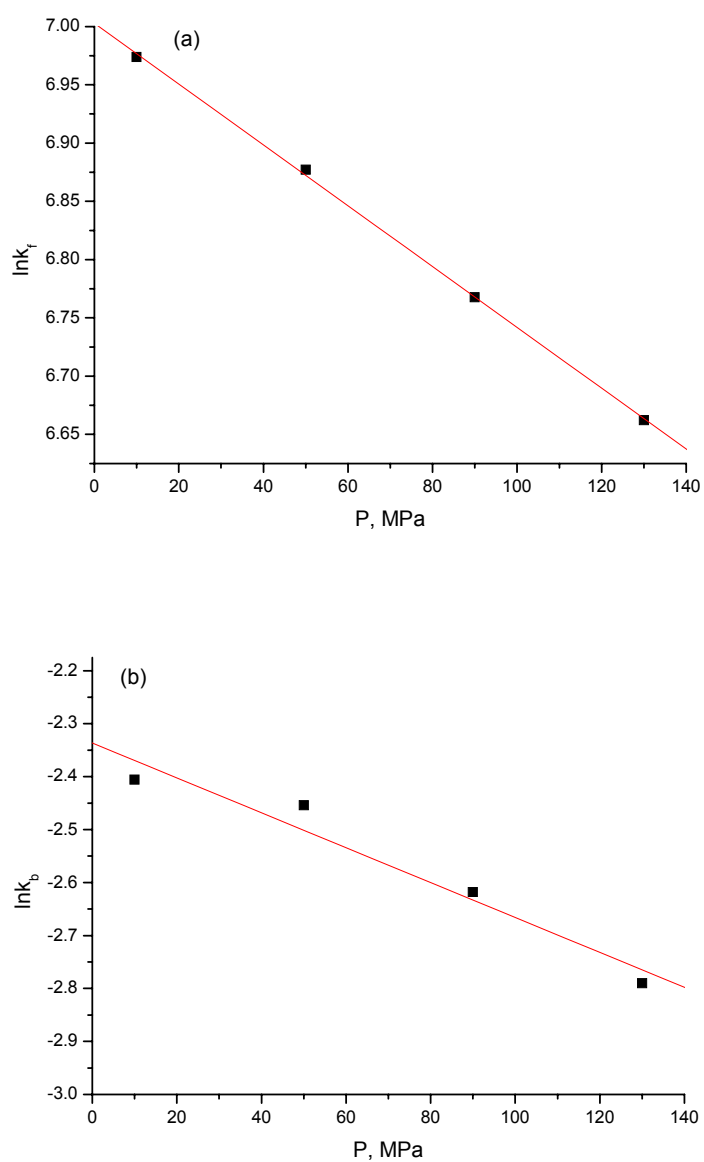

**Figure S17.** (a) and (b) Pressure dependence of the forward rate constant  $k_f$  and the backward rate constant  $k_b$  for the reaction between  $\text{Ni}^{2+}$  and  $1 \times 10^{-5}$  M PADA, respectively, in 0.05 M N-ethylmorpholine buffer, pH 8 and 25 °C.

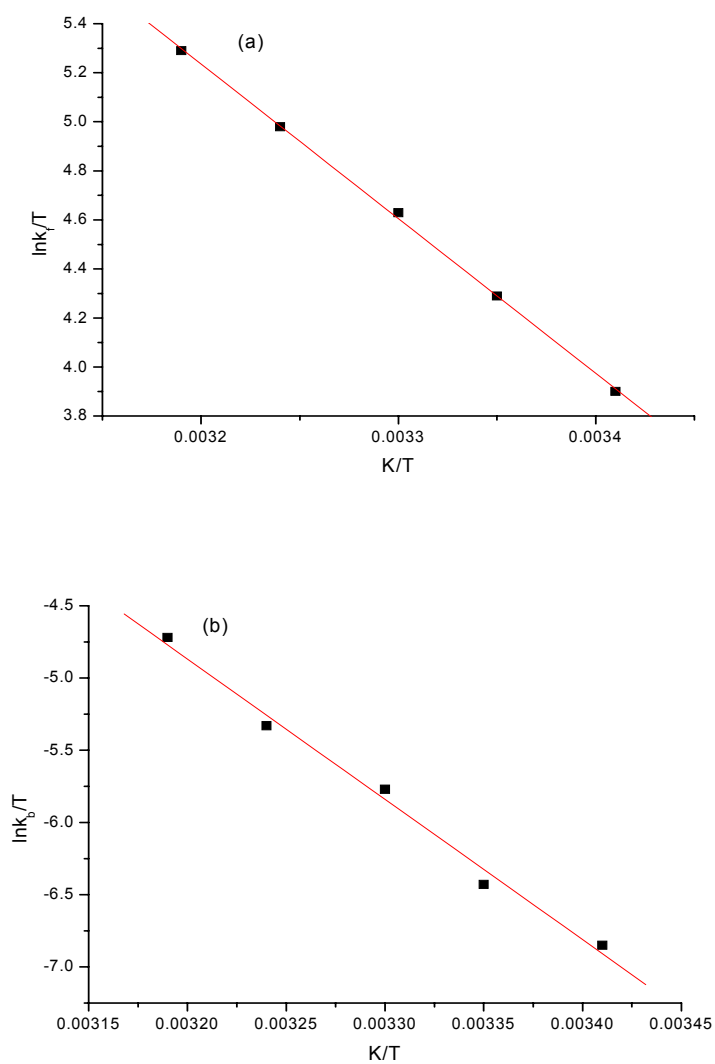

**Figure S18.** (a) and (b) Eyring plots for the forward rate constant  $k_f$  and the backward rate constant  $k_b$  of the reaction between  $\text{Ni}^{2+}$  and  $1 \times 10^{-5}$  M PADA, respectively, in SDS micellar solution, 0.05 M Tris buffer, pH 8 and at ambient pressure.

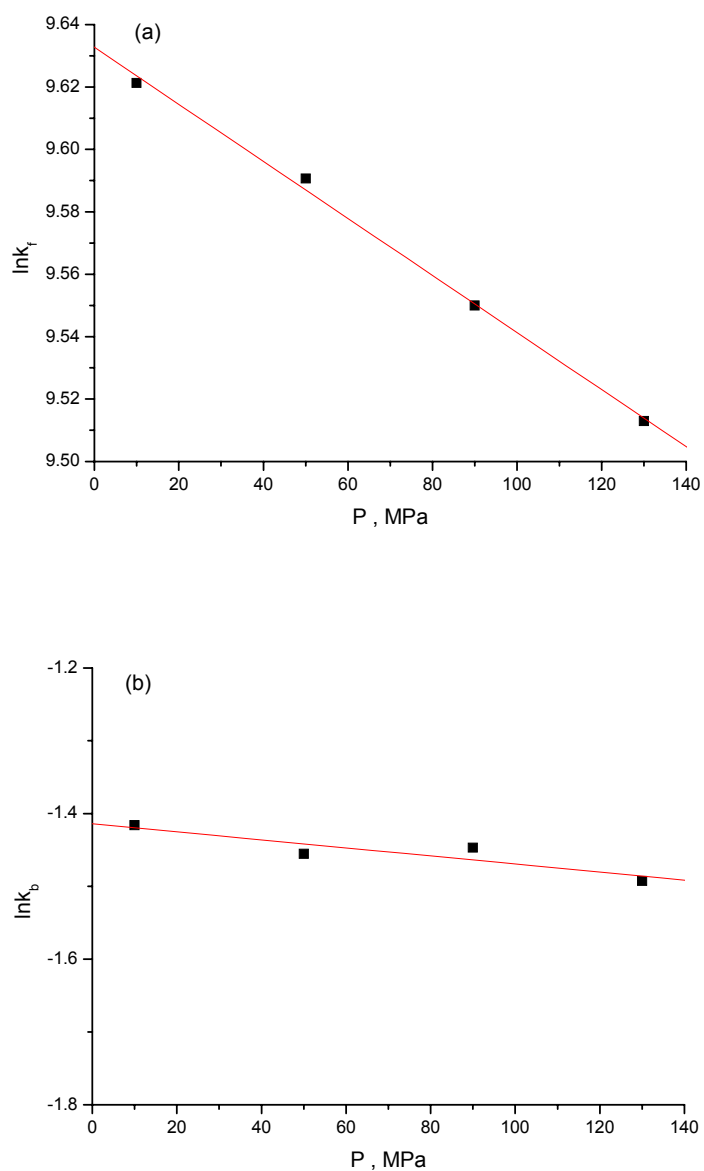

**Figure S19.** (a) and (b) Pressure dependence of the forward rate constant  $k_f$  and the backward rate constant  $k_b$  for the reaction between  $\text{Ni}^{2+}$  and  $1 \times 10^{-5}$  M PADA, respectively, in SDS micellar solution, 0.05 M Tris buffer, pH 8 and 20 °C.

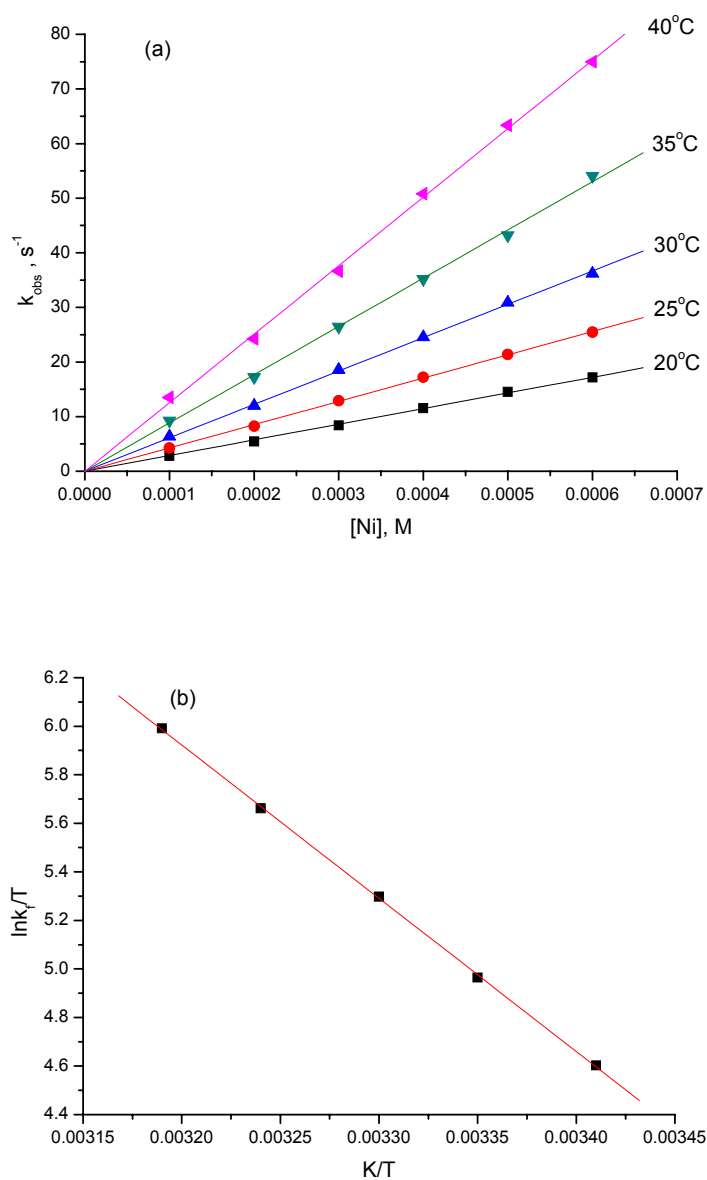

**Figure S20.** (a) Variation of the observed rate constant  $k_{\text{obs}}$  with  $\text{Ni}^{2+}$  concentration for the reaction between  $\text{Ni}^{2+}$  and PADA in SDS micellar solution at ambient pressure, 0.05 M Tris buffer, pH 9 and different temperatures. (b) Eyring plot for the forward rate constant  $k_f$  of the reaction in (a).

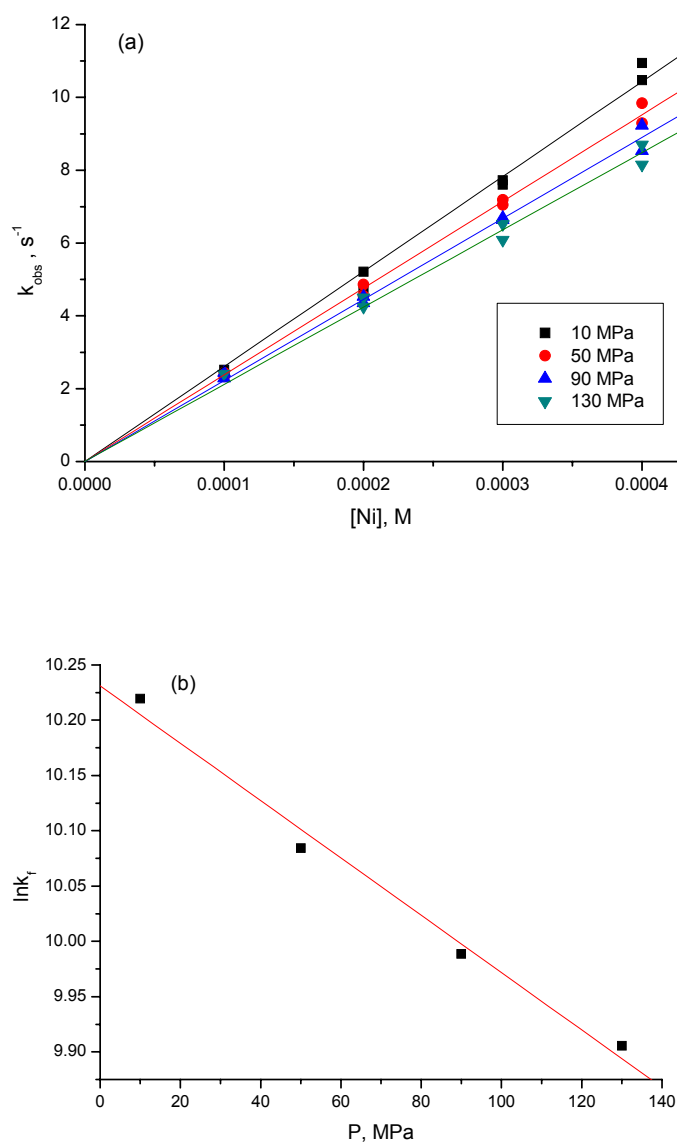

**Figure S21.** (a) Variation of the observed rate constant  $k_{obs}$  with Ni<sup>2+</sup> concentration for the reaction between Ni<sup>2+</sup> and PADA in SDS micellar solution at 20 °C, 0.05 M Tris buffer, pH 9 and different pressures. (b) Pressure dependence of the forward rate constant  $k_f$  for the reaction in (a).



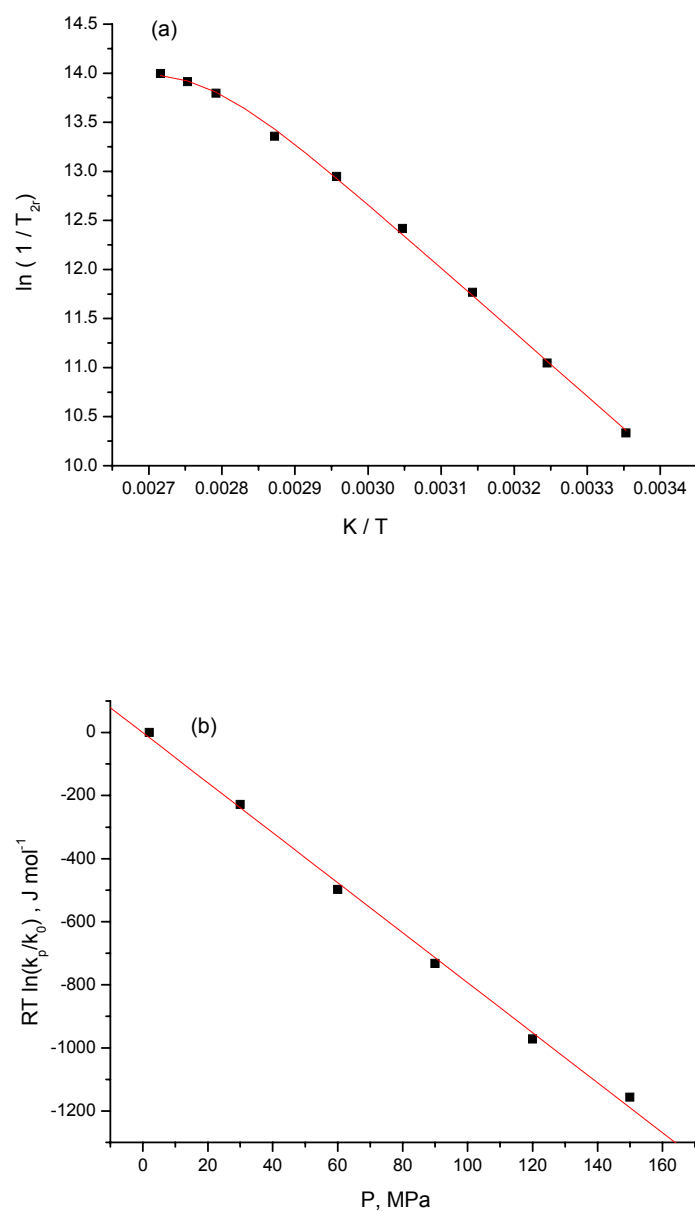

**Figure S22.** (a) Temperature dependence of the reduced transverse relaxation rate ( $1/T_{2r}$ ) and (b) pressure dependence of the water exchange rate constant  $k_{\text{ex}}$  for 0.02 M  $[\text{Ni}(\text{H}_2\text{O})_6]^{2+}$  in MES buffer at pH 6 and 45 °C.

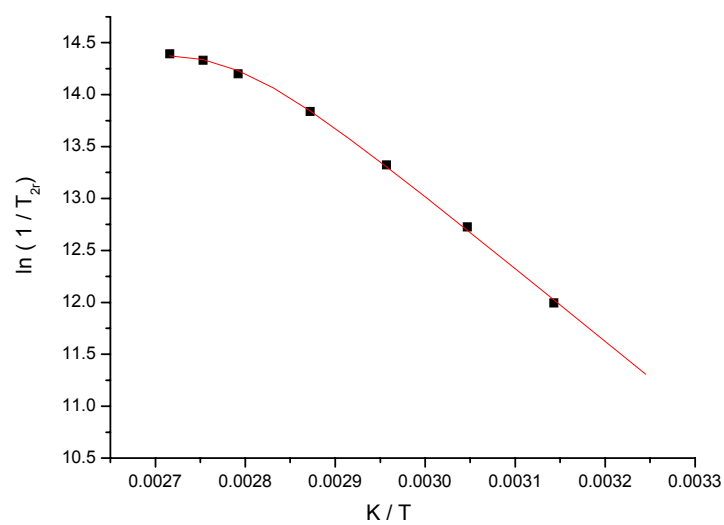

**Figure S23.** Temperature dependence of the reduced transverse relaxation rate ( $1/T_{2r}$ ) for 0.02 M  $[\text{Ni}(\text{H}_2\text{O})_6]^{2+}$  in Tris buffer at pH 7.

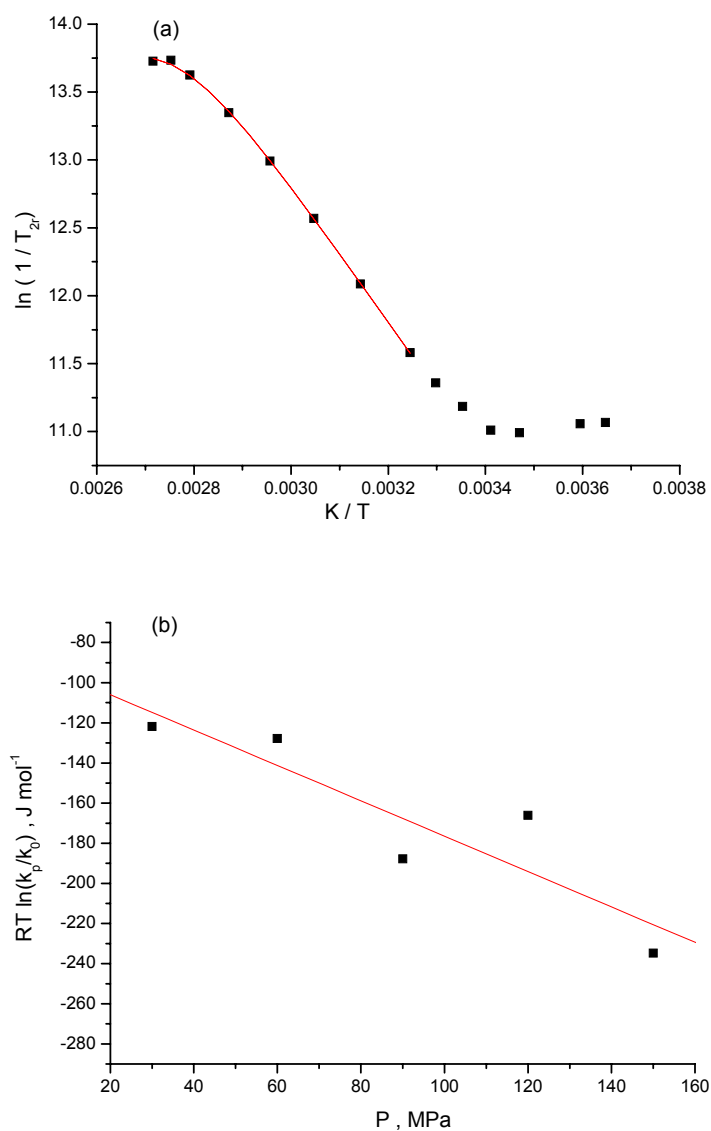

**Figure S24.** (a) Temperature dependence of the reduced transverse relaxation rate ( $1/T_{2r}$ ) and (b) pressure dependence of the water exchange rate constant  $k_{\text{ex}}$  for 0.02 M  $[\text{Ni}(\text{H}_2\text{O})_6]^{2+}$  in Tris buffer at pH 9 and 55 °C. The large scatter in the high pressure data results from the selected scale since the observed pressure effect is indeed very small under these conditions.

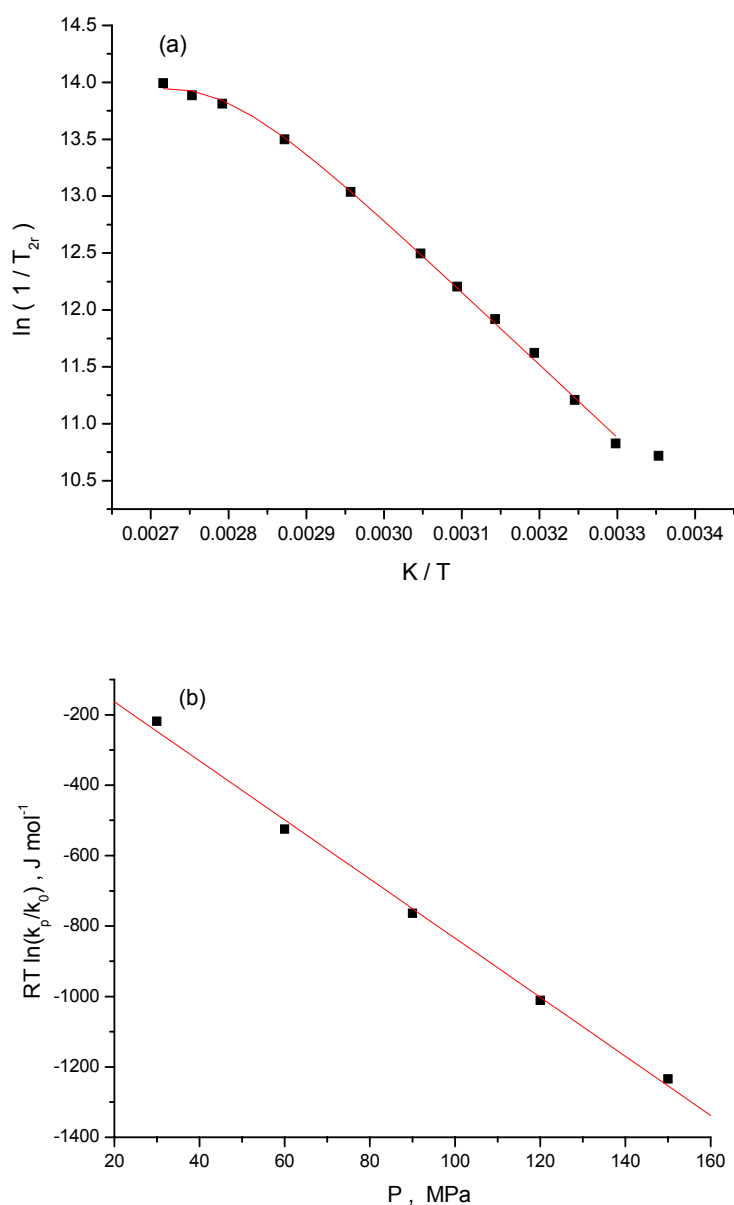

**Figure S25.** (a) Temperature dependence of the reduced transverse relaxation rate ( $1/T_{2r}$ ) and (b) pressure dependence of the water exchange rate constant  $k_{\text{ex}}$  for 0.02 M  $[\text{Ni}(\text{H}_2\text{O})_6]^{2+}$  in N-ethylmorpholine buffer at pH 8 and 55 °C.

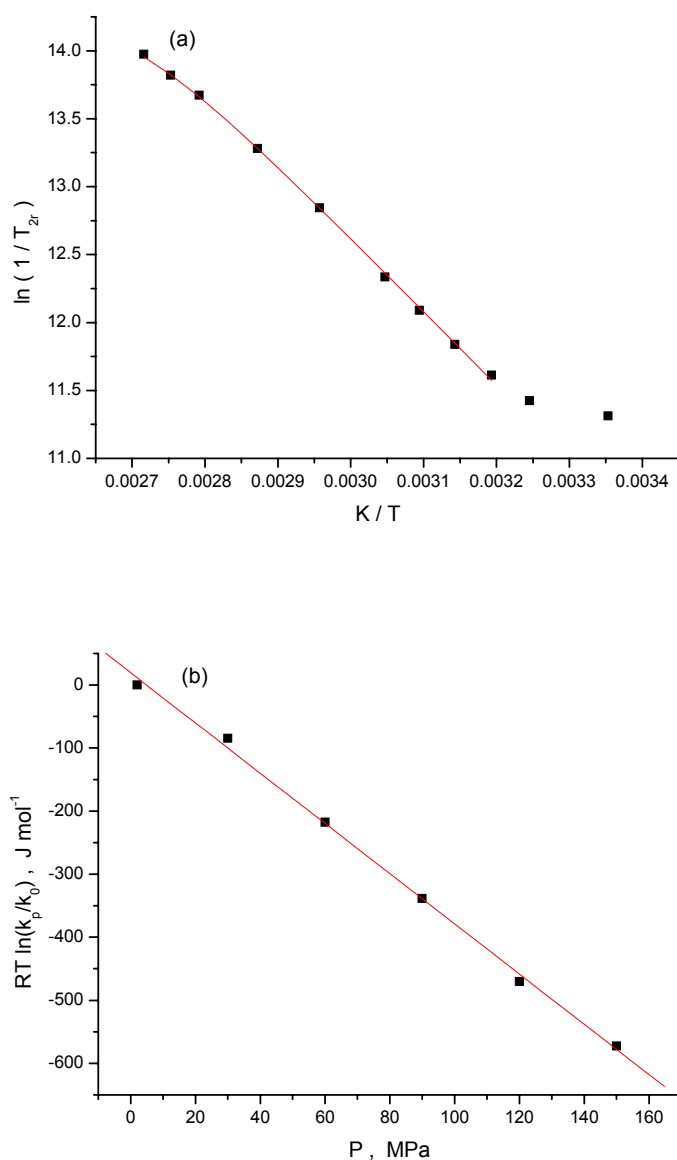

**Figure S26.** (a) Temperature dependence of the reduced transverse relaxation rate ( $1/T_{2r}$ ) and (b) pressure dependence of the water exchange rate constant  $k_{ex}$  of 0.02 M  $[\text{Ni}(\text{H}_2\text{O})_6]^{2+}$  in SDS micellar solution, Tris buffer, pH 8 and 50 °C.
